## Antiemetic Activity of Propofol after Sevoflurane and Desflurane Anesthesia for Outpatient Laparoscopic Cholecystectomy

Dajun Song, M.D., Ph.D.,\* Charles W. Whitten, M.D.,† Paul F. White, Ph.D., M.D., F.A.N.Z.C.A.,‡  
Song Y. Yu, M.D.,§ Eduardo Zarate, M.D.\*

**Background:** Controversy exists regarding the effectiveness of propofol to prevent postoperative nausea and vomiting. This prospective, randomized, single-blinded study was designed to evaluate the antiemetic effectiveness of 0.5 mg/kg propofol when administered intravenously after sevoflurane- compared with desflurane-based anesthesia.

**Methods:** Two hundred fifty female outpatients undergoing laparoscopic cholecystectomy were assigned randomly to one of four treatment groups. All patients were induced with intravenous doses of 2 mg midazolam, 2 µg/kg fentanyl, and 2 mg/kg propofol and maintained with either 1–4% sevoflurane (groups 1 and 2) or 2–8% desflurane (groups 3 and 4) in combination with 65% nitrous oxide in oxygen. At skin closure, patients in groups 1 and 3 were administered 5 ml intravenous saline, and patients in groups 2 and 4 were administered 0.5 mg/kg propofol intravenously. Recovery times were recorded from discontinuation of anesthesia to awakening, orientation, and readiness to be released home. Postoperative nausea and vomiting and requests for antiemetic rescue medication were evaluated during the first 24 h after surgery.

**Results:** Propofol, in an intravenous dose of 0.5 mg/kg, administered at the end of a sevoflurane–nitrous oxide or desflurane–nitrous oxide anesthetic prolonged the times to awakening and orientation by 40–80% and 25–30%, respectively. In group 2 (compared with groups 1, 3, and 4), the incidences of

emesis (22% compared with 47%, 53%, and 47%) and requests for antiemetic rescue medication (19% compared with 42%, 50%, and 47%) within the first 6 h after surgery were significantly lower, and the time to home-readiness was significantly shorter in duration ( $216 \pm 50$  min vs.  $249 \pm 49$  min,  $260 \pm 88$  min, and  $254 \pm 72$  min, respectively).

**Conclusions:** A subhypnotic intravenous dose of propofol (0.5 mg/kg) administered at the end of outpatient laparoscopic cholecystectomy procedures was more effective in preventing postoperative nausea and vomiting after a sevoflurane-based (compared with a desflurane-based) anesthetic. (Key words: Anesthetics; gases; intravenous; postoperative emesis.)

AS a result of favorable emergence profiles and minimal residual sedation,<sup>1,2</sup> sevoflurane and desflurane have become commonly used volatile anesthetics for ambulatory surgery. However, it has been reported that the use of these newer inhalation agents is associated with a higher incidence of postoperative nausea and vomiting (PONV) when compared with a propofol-based anesthetic technique.<sup>3,4</sup> It has been suggested that prophylactic antiemetics are useful for outpatients undergoing procedures associated with a high incidence of PONV.<sup>5,6</sup> However, there is controversy regarding the antiemetic effectiveness of propofol when administered during general anesthesia.<sup>7–11</sup> Unfortunately, most of these studies were inadequately powered and used the traditional volatile anesthetics rather than the newer, less soluble agents desflurane and sevoflurane.

Based on the results of a preliminary PONV study involving commonly used antiemetic drugs,<sup>12</sup> it was hypothesized that the use of propofol would be more effective as a prophylactic antiemetic when administered during a sevoflurane-based (rather than a desflurane-based) anesthetic. This prospective, randomized, single-blinded study was designed to compare sevoflurane with desflurane, when supplemented with a subhypnotic dose of 0.5 mg/kg propofol administered intravenously at the end of surgery, with respect to their

\* Clinical Research Fellow.

† Associate Professor and M. T. "Pepper" Jenkins Professor of Anesthesiology.

‡ Professor and Margaret Milam McDermott Distinguished Chair in Anesthesiology.

§ Assistant Professor.

Received from the Department of Anesthesiology and Pain Management, University of Texas Southwestern Medical Center at Dallas, Dallas, Texas. Submitted for publication October 6, 1997. Accepted for publication May 22, 1998. Supported in part by funds from the Ambulatory Anesthesia Research Foundation (AARF; Dr. Paul F. White, President and CEO). The AARF has not received corporate funding since 1988, and no corporate funds were used to support this study.

Address reprint requests to Dr. White: Professor and McDermott Chair of Anesthesiology, Department of Anesthesiology and Pain Management, University of Texas Southwestern Medical Center, 5323 Harry Hines Boulevard, Dallas, Texas 75235-9068. Address electronic mail to: pwhite@mednet.swmed.edu



## ANTIEMETIC EFFECT OF PROPOFOL WITH DESFLURANE VS. SEVOFLURANE

effects on PONV and recovery times in outpatients undergoing laparoscopic cholecystectomy.

## Methods

After we obtained institutional review board approval, we enrolled 250 female outpatients who were classified as physical status 1 or 2 by the American Society of Anesthesiologists, were 18–65 yr old, and were scheduled for laparoscopic cholecystectomy. We excluded patients with a history of PONV, motion sickness, or gastroesophageal dysfunction; patients who had received antiemetic drugs within 24 h before anesthesia; patients who had nausea or vomiting within the preceding 24 h; or patients who were more than twice their ideal body weight. Based on a computer-generated random number, patients were assigned randomly to one of the following four treatment groups: sevoflurane-control, sevoflurane-propofol, desflurane-control, and desflurane-propofol.

After premedication with 2 mg midazolam administered intravenously, anesthesia was induced with 2  $\mu$ g/kg fentanyl and 2 mg/kg propofol, both administered intravenously. Tracheal intubation was facilitated using 0.6 mg/kg rocuronium administered intravenously. After intubation, anesthesia was maintained with either 1–4% sevoflurane (the sevoflurane-control and sevoflurane-propofol groups) or 2–8% desflurane (the desflurane-control and desflurane-propofol groups) in combination with 65% nitrous oxide in oxygen. Muscle relaxation was maintained using 0.15 mg/kg intravenous rocuronium boluses. In addition, supplemental intravenous bolus doses of 50  $\mu$ g fentanyl were administered to treat increases in mean blood pressure more than 30% of the preanesthesia baseline and/or heart rate more than 100 beats/min, despite increasing the inspired concentrations of sevoflurane and desflurane to 4% and 8%, respectively. At the time of skin closure, patients in the two control groups were administered 5 ml intravenous saline and the two propofol groups were administered 0.5 mg/kg intravenous propofol to prevent vomiting. All patients received 60 mg ketorolac (30 mg intravenously and 30 mg intramuscularly) at the end of surgery for postoperative analgesia. When the operation was completed, residual neuromuscular block was reversed with 50–80 mg edrophonium and 0.5–0.8 mg atropine intravenously, and the maintenance anesthetics were discontinued.

Emergence times were determined at 1-min intervals

from discontinuation of the volatile agent to patient awakening (*i.e.*, opening eyes at verbal command) and orientation (*i.e.*, correctly stating the date, place, and person). The times to discharge from the postanesthesia care unit were assessed at 10-min intervals. The home-readiness criteria were evaluated at 15-min intervals using the modified postanesthesia recovery score (*i.e.*,  $\geq 18$ ).<sup>13</sup> Nausea, vomiting, and requests for rescue antiemetics (*e.g.*, 10–20 mg metoclopramide administered intravenously) were assessed by direct questioning of the patient at 10-min intervals in the postanesthesia care unit and at 30-min intervals in the phase 2 (step-down) unit. Requirements for postoperative analgesic medication (intravenous fentanyl or meperidine, oral hydrocodone) were recorded. The criteria for administering analgesic medication was a patient's request for pain relief or clinically obvious distress (indicated by moaning, for example).

After the patient was discharged from the hospital, follow-up telephone calls were made 6, 12, and 24 h after surgery. If the 12-h follow-up call could not be completed before 9:00 PM, it was made at 8:00 AM the following morning to inquire about emesis during the preceding 12-h interval. If the patient was admitted to the hospital overnight ("23-hour" admission), the assessments were made at hourly intervals for 3 h at the ward and subsequently 12 and 24 h after surgery. The criteria for overnight admission of patients to the hospital included surgical considerations (bile leakage, bleeding, placement of drains, fistula to adjoining structure), severe postoperative side effects (intractable PONV lasting more than 4 h), and miscellaneous factors (procedure completed late in the day, long travel distance). All the postoperative assessments were made by an independent "blinded" observer who was unaware of the primary maintenance anesthetic and prophylactic antiemetic therapy. If intractable PONV occurred after discharge, the patient was treated with rectal prochlorperazine.

A power analysis ( $\alpha = 0.05$ ,  $\beta = 80\%$ ) was performed before the study began. This analysis suggested that 49 patients in each group should be adequate to detect a 30% decrease in emesis among the groups (assuming a 60% incidence of emesis in the control groups). Differences in the time to the first emetic episode were analyzed using Kaplan-Meier analysis. Categorical data were analyzed by the chi-squared test, and continuous data were analyzed by one-way analysis of variance. The Newman-Keuls test



**Table 1. Demographic Data, Anesthesia and Operating Times, Dosages of Fentanyl and Inhalation Agents, and Intravenous Fluid Volumes in the Four Anesthetic Treatment Groups**

|                               | Sevoflurane         |                      | Desflurane          |                      |
|-------------------------------|---------------------|----------------------|---------------------|----------------------|
|                               | Control<br>(n = 62) | Propofol<br>(n = 64) | Control<br>(n = 60) | Propofol<br>(n = 64) |
| Age (yr)                      | 31 ± 8              | 32 ± 12              | 35 ± 12             | 35 ± 13              |
| Weight (kg)                   | 78 ± 13             | 77 ± 15              | 75 ± 19             | 77 ± 19              |
| Anesthesia time (min)         | 128 ± 41            | 123 ± 40             | 120 ± 27            | 120 ± 30             |
| Operating time (min)          | 99 ± 37             | 96 ± 39              | 94 ± 27             | 90 ± 27              |
| Intraoperative fentanyl (μg)  | 224 ± 75            | 217 ± 97             | 217 ± 93            | 222 ± 103            |
| Volatile anesthetic (MAC · h) | 2.3 ± 1.0           | 2.5 ± 1.2            | 2.1 ± 1.1           | 2.1 ± 1.0            |
| Intravenous fluids (ml)       | 1,743 ± 416         | 1,653 ± 466          | 1,583 ± 414         | 1,609 ± 499          |

MAC · h = sum of end-tidal concentration divided by the MAC value multiplied by the duration of time (hour) at that concentration.

Values are mean ± SD.

was used for *post hoc* comparisons among treatment groups. A probability value < 0.05 was considered significant.

## Results

There were no significant differences among the four groups with respect to demographic characteristics, duration of anesthesia and surgery, intraoperative fentanyl dosage, volatile anesthetic requirements (*i.e.*, minimum alveolar concentration hour [calculated as the sum of end-tidal concentration divided by the minimum alveolar concentration value multiplied by the duration of time (hour) at that concentration]), and intraoperative fluids (table 1). Of the patients in each treatment group, 18–21% were admitted to the hospital overnight, but none

of the unanticipated admissions were because of intractable PONV (table 2). The “rescue” pain medications administered during the first 6 h after surgery are summarized in table 3. No significant differences were found among the patients in the four groups with respect to postoperative analgesic requirements.

The times to awakening and orientation in the propofol prophylaxis groups were 2–4 min more ( $P < 0.05$ ) than in the respective control groups. Although time to discharge from the postanesthesia care unit was similar in all treatment groups, the time to home-readiness for patients discharged on the day of surgery was significantly less in the sevoflurane-propofol group (table 2).

The incidence of PONV and requests for rescue antiemetics within the first 6 h, 6–12 h, and 12–24 h after surgery are summarized in table 4. The percentiles of the

**Table 2. Recovery Times and Need for Overnight Hospitalization after Laparoscopic Cholecystectomy in the Four Anesthetic Treatment Groups**

|                                                   | Sevoflurane         |                      | Desflurane          |                      |
|---------------------------------------------------|---------------------|----------------------|---------------------|----------------------|
|                                                   | Control<br>(n = 62) | Propofol<br>(n = 64) | Control<br>(n = 60) | Propofol<br>(n = 64) |
| Awakening (min)                                   | 5 ± 3               | 9 ± 3*               | 5 ± 1               | 7 ± 3†               |
| Orientation (min)                                 | 12 ± 4              | 15 ± 4*              | 10 ± 2              | 13 ± 5†              |
| PACU discharge (min)                              | 75 ± 2              | 81 ± 9               | 82 ± 8              | 78 ± 6               |
| Home readiness (min)<br>(same-day discharge only) | 249 ± 49            | 216 ± 50‡            | 260 ± 88            | 254 ± 72             |
| Hospital admission (23 h)                         |                     |                      |                     |                      |
| Bile leak spillage (n)                            | 7                   | 6                    | 8                   | 9                    |
| Bleeding (n)                                      | 3                   | 5                    | 3                   | 1                    |
| Drainage (n)                                      | 0                   | 0                    | 0                   | 1                    |
| Social reasons (n)                                | 3                   | 1                    | 0                   | 2                    |

Values are mean ± SD and numbers (n).

\*  $P < 0.05$  versus the sevoflurane and desflurane control groups.

†  $P < 0.05$  versus the desflurane control group.

‡  $P < 0.05$  versus the sevoflurane control group.



## ANTIEMETIC EFFECT OF PROPOFOL WITH DESFLURANE VS. SEVOFLURANE

**Table 3. Rescue Pain Medication during the First 6 h after Laparoscopic Cholecystectomy in the Four Anesthetic Treatment Groups**

|                                       | Sevoflurane         |                      | Desflurane          |                      |
|---------------------------------------|---------------------|----------------------|---------------------|----------------------|
|                                       | Control<br>(n = 62) | Propofol<br>(n = 64) | Control<br>(n = 60) | Propofol<br>(n = 64) |
| Intravenous fentanyl [n ( $\mu$ g)]   | 12 (63 $\pm$ 29)    | 18 (44 $\pm$ 25)     | 18 (54 $\pm$ 24)    | 16 (56 $\pm$ 25)     |
| Intravenous meperidine [n (mg)]       | 7 (43 $\pm$ 12)     | 9 (33 $\pm$ 11)      | 12 (44 $\pm$ 11)    | 10 (40 $\pm$ 13)     |
| Oral hydrocodone [n (mg)]             | 21 (7 $\pm$ 3)      | 16 (6 $\pm$ 3)       | 12 (6 $\pm$ 2)      | 18 (8 $\pm$ 3)       |
| Total patient received analgesics (n) | 36                  | 39                   | 35                  | 34                   |

Values are patient number (n) and average analgesic dosage ( $\mu$ g or mg) administered (mean values  $\pm$  SD). There are no significant differences among the four groups.

Kaplan-Meier product-limit distribution of the times to the first emetic episode showed that times until 25% of patients experienced emesis were 0.7, 3.5, 0.3, and 0.7 h in the sevoflurane-control, sevoflurane-propofol, desflurane-control, and desflurane-propofol groups, respectively (fig. 1). The sevoflurane-propofol group had a significantly ( $P < 0.01$ ) decreased incidence of PONV and fewer requests for rescue antiemetic within the first 6 h after surgery when compared with the other three treatment groups. However, there were no differences between the desflurane-control and desflurane-propofol groups with respect to the incidences of PONV or the need for antiemetic rescue during the 24-h follow-up period. Finally, there were no significant differences among the four treatment groups with respect to the incidence of PONV and use of antiemetic rescue medications from 6–24 h after surgery.

## Discussion

Controversy exists regarding the antiemetic effectiveness of subhypnotic doses of propofol when used in outpatients at high risk for PONV. Although Campbell and Thomas<sup>11</sup> reported that a subanesthetic dose of propofol administered at the end of surgery had no antiemetic effect in patients undergoing laparoscopy using an isoflurane-based anesthetic, other studies<sup>7–9</sup> suggested that a low dose of propofol was effective in preventing PONV after either an isoflurane- or an enflurane-based anesthetic. Recently, Gan *et al.*<sup>10</sup> reported that use of propofol as an induction agent and at the end of surgery during isoflurane-based anesthesia failed to prevent PONV in patients undergoing breast surgery compared with using propofol both for induction and maintenance of anesthesia. In addition, Scuderi *et al.*<sup>14</sup> reported that a low-dose infusion of propofol similarly failed to show any beneficial effect in reducing PONV

when used as the sole prophylactic medication in female patients undergoing outpatient laparoscopy using an isoflurane-based anesthetic technique.

In the current study, propofol had significant antiemetic activity when administered at the end of surgery with sevoflurane anesthesia but not when it was administered in conjunction with desflurane anesthesia. To detect an effect of propofol after desflurane in this patient population, a much larger group would be necessary. The failure of propofol to more effectively protect against PONV after desflurane anesthesia is consistent with the findings of Van Hemelrijck *et al.*<sup>3</sup> when propofol was administered for induction followed by desflurane for maintenance of anesthesia. Of interest, a previous study involving the use of sevoflurane and propofol

**Table 4. The Incidence of Postoperative Nausea and Vomiting and Requests for Rescue Antiemetic Medication in the Four Anesthetic Treatment Groups during the First 24 h after Laparoscopic Cholecystectomy**

|              | Sevoflurane         |                      | Desflurane          |                      |
|--------------|---------------------|----------------------|---------------------|----------------------|
|              | Control<br>(n = 62) | Propofol<br>(n = 64) | Control<br>(n = 60) | Propofol<br>(n = 64) |
| Within 6 h   |                     |                      |                     |                      |
| Nausea       | 36 (60)             | 20 (31)*             | 41 (68)             | 34 (53)              |
| Vomiting     | 29 (47)             | 14 (22)*             | 32 (53)             | 30 (47)              |
| Rescue       | 26 (42)             | 12 (19)*             | 30 (50)             | 30 (47)              |
| 6–12 h       |                     |                      |                     |                      |
| Nausea       | 19 (31)             | 17 (27)              | 26 (43)             | 22 (34)              |
| Vomiting     | 14 (23)             | 12 (19)              | 19 (32)             | 16 (25)              |
| Rescue       | 0 (0)               | 0 (0)                | 0 (0)               | 0 (0)                |
| 12–24 h      |                     |                      |                     |                      |
| Nausea       | 9 (15)              | 10 (16)              | 12 (20)             | 14 (22)              |
| Vomiting     | 5 (8)               | 6 (9)                | 6 (10)              | 8 (13)               |
| Rescue       | 0 (0)               | 0 (0)                | 0 (0)               | 0 (0)                |
| Overall PONV | 38 (61)             | 22 (34)*             | 41 (68)             | 37 (58)              |

PONV = postoperative nausea and vomiting. Values are number (n) and percent (%) within each treatment group.

\*  $P < 0.05$  versus the other three treatment groups.



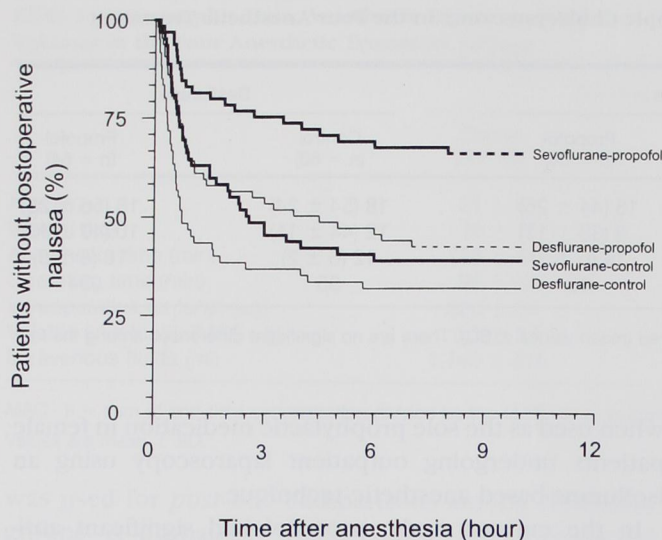

Fig. 1. Distribution of times to the first episode of postoperative nausea and/or vomiting in the four anesthetic treatment groups. Thick solid line = sevoflurane-control group; thick dashed line = sevoflurane-propofol group; fine solid line = desflurane-control group; fine dashed line = desflurane-propofol group.

showed that the use of propofol to induce anesthesia was effective in reducing PONV after sevoflurane anesthesia in outpatients undergoing laparoscopic surgery.<sup>4</sup> However, although the small dose of propofol (0.5 mg/kg) administered at the end of surgery prolonged the times to awakening and orientation, the time to discharge from the postanesthesia care unit was not delayed. More importantly, the times to home-readiness for discharge were decreased for patients receiving a subhypnotic dose of propofol after a sevoflurane-based anesthetic.

It has been suggested that there is little difference between sevoflurane and desflurane with respect to the intrinsic emetogenic potential compared with other inhalation anesthetics.<sup>15,16</sup> In a recent study, Philip *et al.*<sup>17</sup> reported a significantly lower incidence of postoperative nausea both in the postanesthesia care unit and in the 24-h postdischarge period after sevoflurane-nitrous oxide anesthesia compared with isoflurane-nitrous oxide anesthesia. The current study suggests that sevoflurane is more advantageous than desflurane in preventing PONV only when propofol was administered at the end of surgery. Therefore, these data suggest that a more favorable drug interaction occurs between sevoflurane and propofol than between desflurane and propofol with respect to antiemetic prophylaxis, and this combination may contribute to an earlier discharge after outpatient proce-

dures associated with a high incidence of PONV (*e.g.*, laparoscopic cholecystectomy). Unfortunately, a scientific explanation for this difference is not available.

Decreasing the incidence of PONV after sevoflurane and desflurane anesthesia is important in facilitating early recovery after ambulatory surgery. Although prophylactic antiemetics have proven to be useful in decreasing the incidence of PONV in outpatients at high risk of PONV after desflurane anesthesia,<sup>18</sup> the optimal combination of antiemetic and inhalation agents is yet to be determined. Achieving a more effective outcome with respect to PONV will become increasingly important in the future as a result of increasing pressure to decrease discharge times (*i.e.*, fast track)<sup>19,20</sup> and to reduce unanticipated hospital admissions after ambulatory surgery.<sup>19-21</sup>

In conclusion, use of propofol (2 mg/kg administered intravenously) for induction followed by a second dose (0.5 mg/kg administered intravenously) after laparoscopic cholecystectomy is more effective in preventing PONV with sevoflurane than desflurane. None of the patients in either the desflurane or the sevoflurane groups required overnight hospital admission because of intractable PONV.

## References

- White PF: Studies of desflurane in outpatient anesthesia. *Anesth Analg* 1992; 75(suppl):S47-54
- Smith I, Nathanson MH, White PF: The role of sevoflurane in outpatient anesthesia. *Anesth Analg* 1995; 81(suppl):S67-72
- Van Hemelrijck J, Smith I, White PF: Use of desflurane for outpatient anesthesia. A comparison with propofol and nitrous oxide. *ANESTHESIOLOGY* 1991; 75:197-203
- Fredman B, Nathanson MH, Smith I, Wang J, Klein K, White PF: Sevoflurane for outpatient anesthesia: A comparison with propofol. *Anesth Analg* 1995; 81:823-8
- Eriksson H, Korttila K: Recovery profile after desflurane with or without ondansetron compared with propofol in patients undergoing outpatient gynecological laparoscopy. *Anesth Analg* 1996; 82:533-8
- Watcha MF, White PF: Postoperative nausea and vomiting: Its etiology, treatment, and prevention. *ANESTHESIOLOGY* 1992; 77:162-84
- Ewalenko P, Janny S, Dejonckheere M, Andry G, Wyna C: Antiemetic effect of subhypnotic doses of propofol after thyroidectomy. *Br J Anaesth* 1996; 77:463-7
- Montgomery JE, Sutherland CJ, Kestin IG, Sneyd JR: Infusions of subhypnotic doses of propofol for the prevention of postoperative nausea and vomiting. *Anaesthesia* 1996; 51:554-7
- Ding Y, Fredman B, White PF: Recovery following outpatient anesthesia: Use of enflurane versus propofol. *J Clin Anesth* 1993; 5:447-50
- Gan TJ, Ginsberg B, Grant AP, Glass PSA: Double-blind, randomized comparison of ondansetron and intraoperative propofol to pre-



## ANTIEMETIC EFFECT OF PROPOFOL WITH DESFLURANE VS. SEVOFLURANE

vent postoperative nausea and vomiting. *ANESTHESIOLOGY* 1996; 85: 1036-42

11. Campbell NN, Thomas AD: Does propofol have an anti-emetic effect? A prospective study of the anti-emetic effect of propofol following laparoscopy. *Anaesth Intens Care* 1991; 19:385-7

12. Song D, White PF, Whitten CW, Yu SY: Postoperative nausea and vomiting with sevoflurane *vs* desflurane in outpatients undergoing laparoscopic cholecystectomy (abstract). *ANESTHESIOLOGY* 1996; 85:A34

13. Aldrete JA: The post-anesthesia recovery score revisited. *J Clin Anesth* 1995; 7:89-91

14. Scuderi PE, D'Angelo R, Harris L, Mims GR III, Weeks DB, James RL: Small-dose propofol by continuous infusion does not prevent postoperative vomiting in females undergoing outpatient laparoscopy. *Anesth Analg* 1997; 84:71-5

15. Jones RM: Desflurane and sevoflurane: Inhalation anaesthetics for this decade? *Br J Anaesth* 1990; 65:527-36

16. Eger EI II: New inhaled anesthetics. *ANESTHESIOLOGY* 1994; 80: 906-22

17. Philip BK, Kallar SK, Bogetz MS, Scheller MS, Wetchler BV: A multicenter comparison of maintenance and recovery with sevoflurane or isoflurane for adult ambulatory anesthesia. *Anesth Analg* 1996; 83:314-9

18. Tang J, Wang B, White PF, Watcha MF, Qi J, Wender RH: The effect of timing of ondansetron administration on its efficacy, cost-effectiveness, and cost-benefit as a prophylactic antiemetic in the ambulatory setting. *Anesth Analg* 1998; 86:274-82

19. Davis PJ, McGowan FX, Landsman I, Maloney K, Hoffmann P: Effect of antiemetic therapy on recovery and hospital discharge time: A double-blind assessment of ondansetron, droperidol, and placebo in pediatric patients undergoing ambulatory surgery. *ANESTHESIOLOGY* 1995; 83:956-60

20. Song D, Joshi GP, White PF: Fast-tracking eligibility after ambulatory anesthesia: A comparison of desflurane, sevoflurane, and propofol. *Anesth Analg* 1998; 86:267-73

21. Gold BS, Kitz DS, Lecky JH, Neuhaus JM: Unanticipated admission to the hospital following ambulatory surgery. *JAMA* 1989; 262: 3008-10
